# Supplementary material
Source: PubMed Central journal article supplement (PMC3589172)
Supplement: mt2012211x1.pdf [file mt2012211x1.pdf]

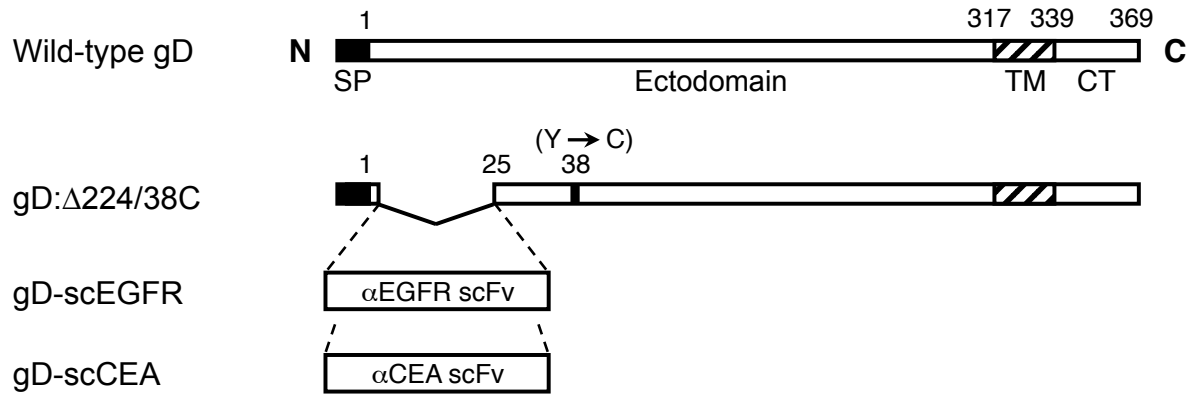

**Figure S1.** Structures of detargeted ( $\Delta 224/38C$ ) and retargeted (scEGFR, scCEA) gD constructs. SP, signal peptide; TM, transmembrane domain; CT, cytoplasmic tail; N, amino terminus; C, carboxyl terminus. Numbers indicate amino-acid positions relative to the start of the mature protein (position 1).
