# Supplementary material
Source: PubMed Central journal article supplement (PMC3589172)
Supplement: mt2012211x2.pdf [file mt2012211x2.pdf]

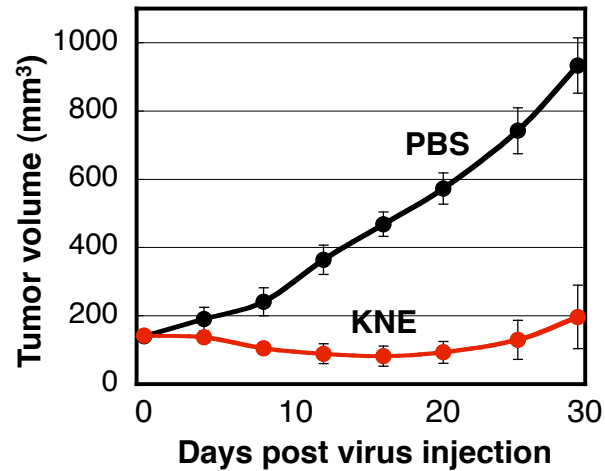

**Figure S2.** Tumor growth inhibition. U87 cells were injected subcutaneously into nude mice and when tumor volumes reached  $\sim 140$  mm<sup>3</sup>,  $5 \times 10^8$  gc of KNE (red; n=6) or PBS (black; n=5) were injected intratumorally. Tumor volumes were measured at 4-5 d intervals until signs of discomfort and humane sacrifice. ANOVA analysis showed a statistically significant difference between the two groups ( $p < 0.0001$ ).
