# Supplementary material
Source: PubMed Central journal article supplement (PMC3589172)
Supplement: mt2012211x3.pdf [file mt2012211x3.pdf]

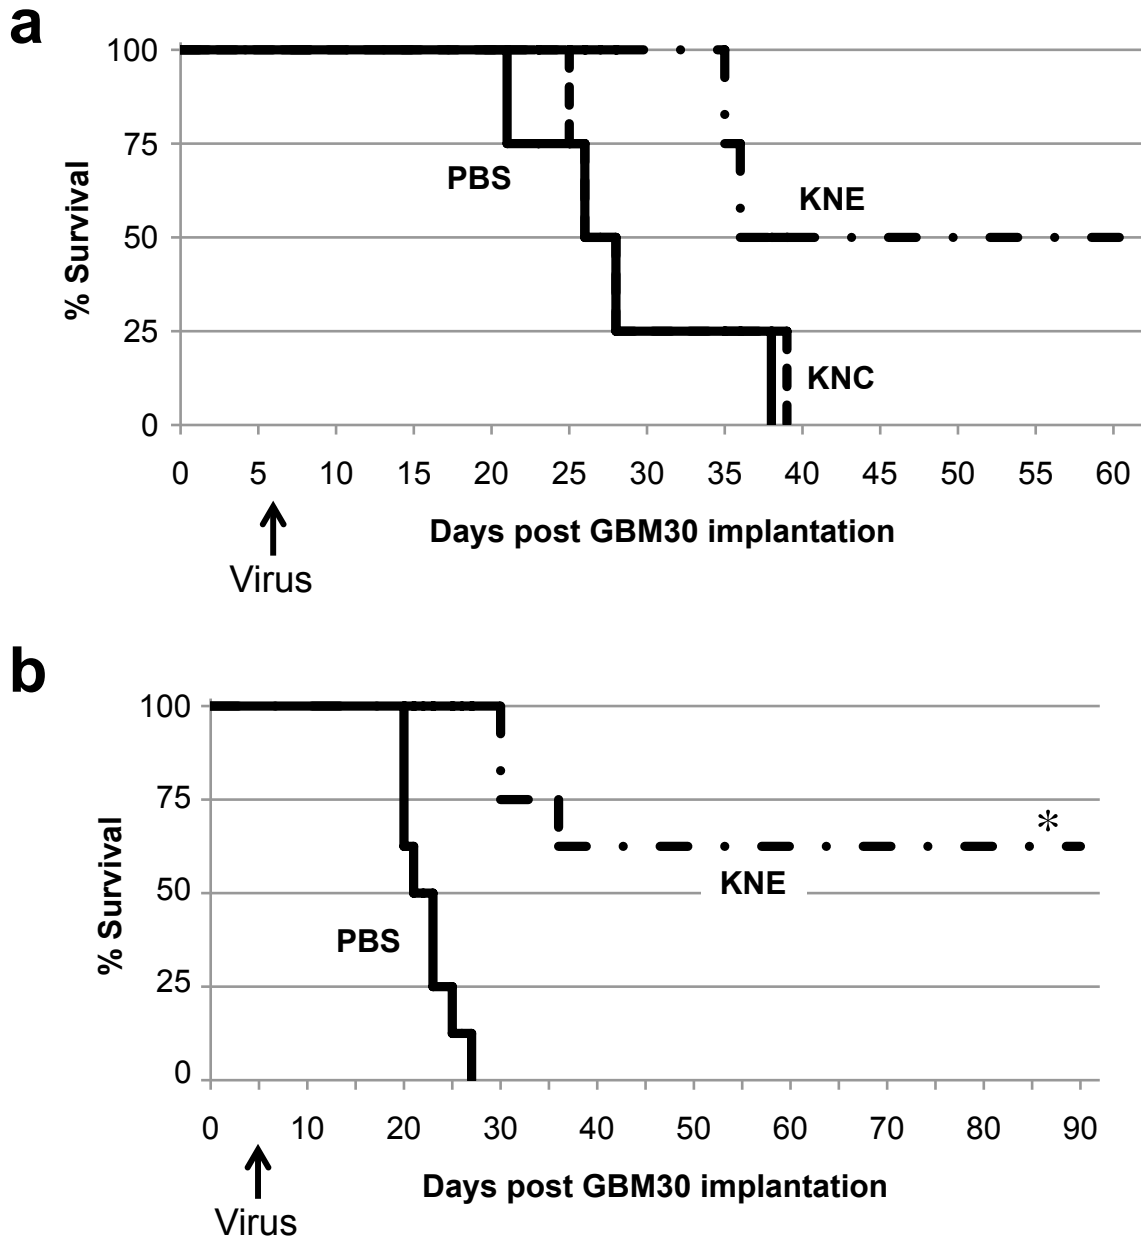

**Figure S3.** Survival of nude mice with orthotopic GBM30 implants (experiments performed at the University of Pittsburgh). **(a)** Kaplan-Meier survival plot comparing PBS, KNE and KNC treatments ( $n=4/\text{group}$ ) administered at 6 d post tumor cell implantation. **(b)** Kaplan-Meier plot comparing PBS and KNE treatments ( $n=8/\text{group}$ ) administered at 5 d post tumor cell implantation. \*,  $p<0.001$  ((log rank and Breslow tests) compared to mice treated with PBS.
