# Supplementary material
Source: PubMed Central journal article supplement (PMC3589172)
Supplement: mt2012211x4.pdf [file mt2012211x4.pdf]

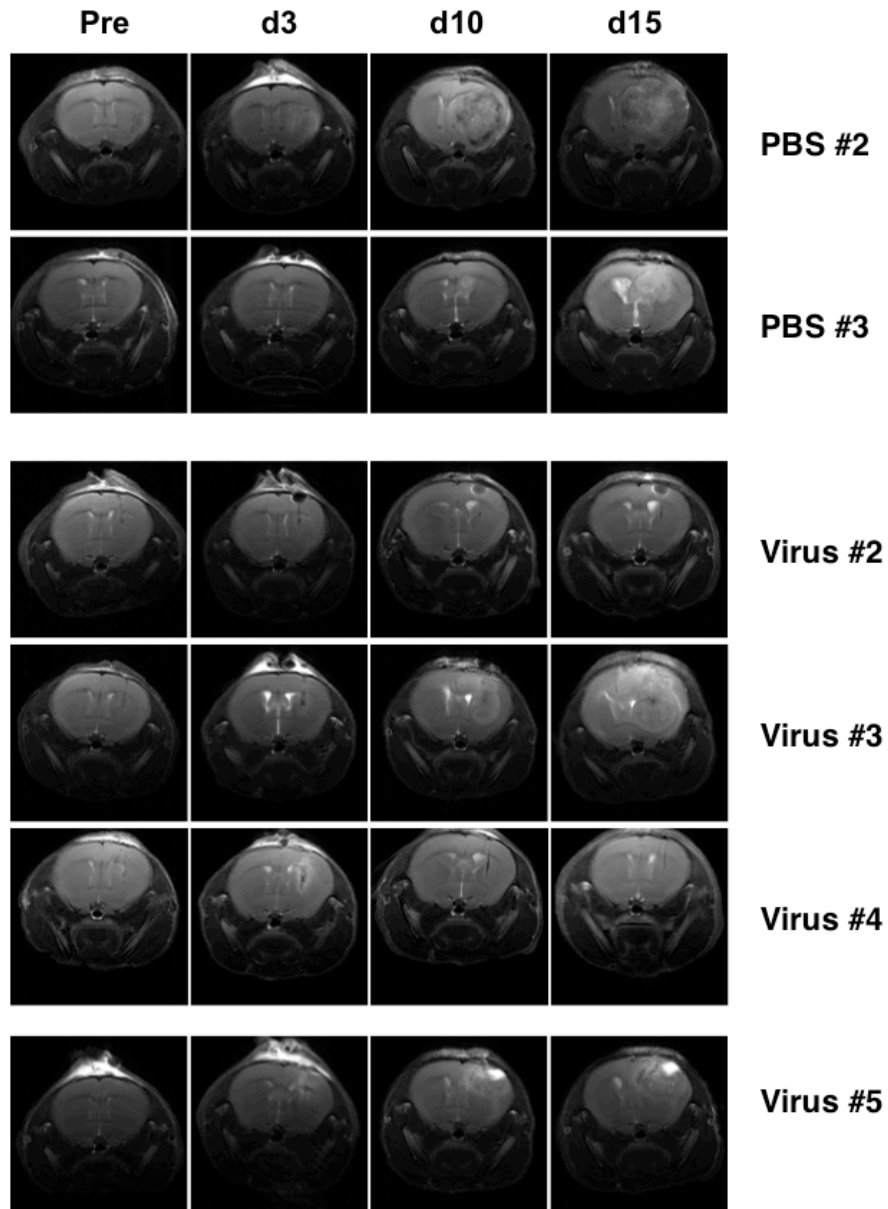

**Figure S4.** T2-weighted brain MRI images of additional animals from the survival experiment of Fig. 5a. Treatment groups were PBS or KNE (Virus). Animals were imaged one day before (Pre) and on days 3, 10 and 15 after treatment. Virus-treated animals #2 and #4 survived without symptoms for the duration of the experiment while virus-treated animals #3 and #5 showed signs of morbidity prompting euthanasia prior to termination of the study. Note that the tumor of virus animal #5 (Virus #5) grew closer to the surface, away from the site of tumor-cell implant. Thus it is likely that the virus delivered at the same coordinates may not have reached the core of the growing tumor.
